# Supplementary material for: Interactions between mitochondria-damaging platinum(iv) prodrugs and cytochrome c
Source: Royal Society of Chemistry journal article supplement (doi:10.1039/d1dt03875c), 2021-12-30
Supplement: d1dt03875c1.pdf [file d1dt03875c1.pdf]

## Interactions between Mitochondria-Damaging Platinum(IV) Prodrugs and Cytochrome c

Amarasooriya M. D. S. Jayawardhana,<sup>a</sup> and Yao-Rong Zheng <sup>\*a</sup>

a. Department of Chemistry and Biochemistry, Kent State University, 236 Integrated Sciences Building, Kent, Ohio 44242.

\* Corresponding author. Email: [yzheng7@kent.edu](mailto:yzheng7@kent.edu)

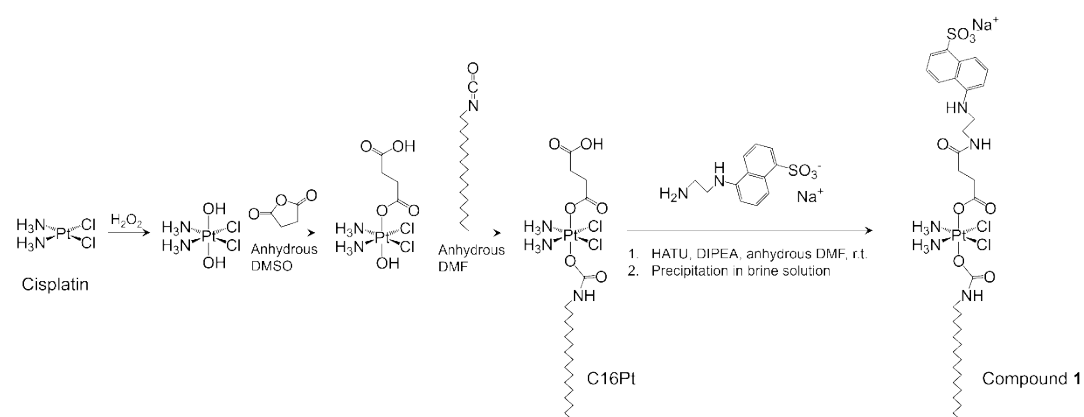

**Fig S1.** Synthesis of the amphiphilic Pt(IV) prodrug (1).

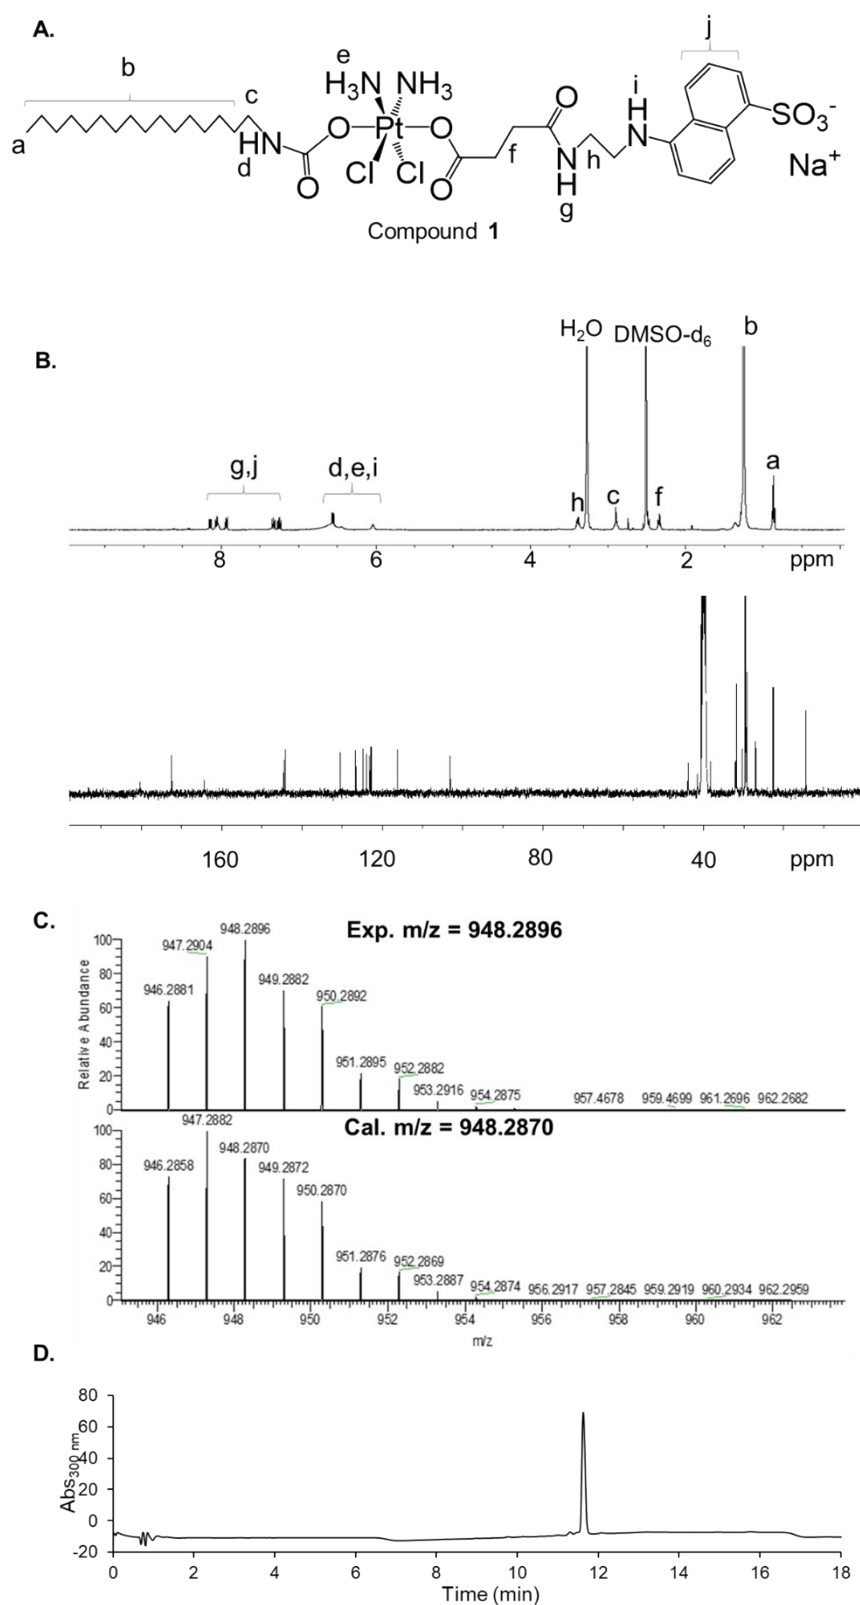

**Fig S2.** Characterization of Compound 1: **A.**  $^1\text{H}$  NMR spectrum in  $\text{DMSO-d}_6$ ; **B.**  $^{13}\text{C}$  NMR spectrum in  $\text{DMSO-d}_6$ ; **C.** High resolution ESI-MS spectrum; **D.** Analytic HPLC analysis (Gradient: 0 min 5% B, 5 min 5% B, 10 min 95% B, 15 min 5% B. solvent A is 0.1% TFA aqueous solution and B is acetonitrile).

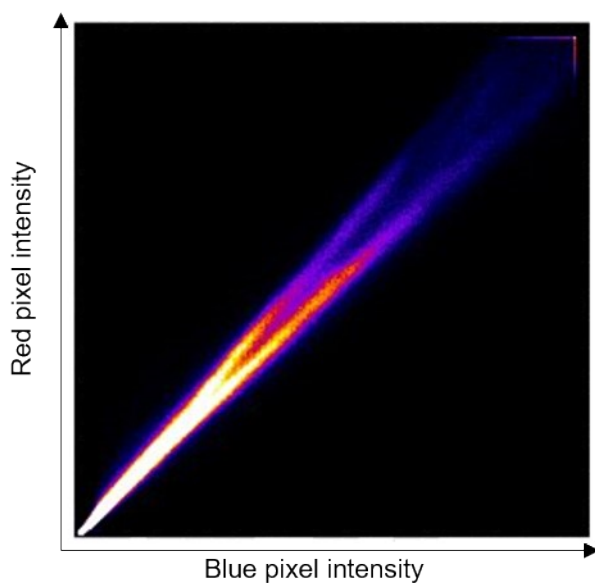

**Fig S3.** Colocalization analysis of **1** (blue) and Mitotracker Red (red) in HeLa cells. Pearson's correlation coefficient (PCC) = 0.993.

**Table S1:** Concentration values of cytochrome c (measured values are based on UV-vis absorbance data) and Compound **1** (measured with GFAAS) after dialyzed.

| Sample                    | [Cyt c]/ $\mu\text{M}$<br>used | [ <b>1</b> ]/ $\mu\text{M}$<br>used | [Cyt c]/ $\mu\text{M}$<br>measured | [ <b>1</b> ]/ $\mu\text{M}$<br>measured | Ratio<br>([ <b>1</b> ]/[Cyt c]) |
|---------------------------|--------------------------------|-------------------------------------|------------------------------------|-----------------------------------------|---------------------------------|
| Cyt c                     | 50                             | 0                                   | 50.0                               | 0                                       | 0.0                             |
| Cyt c + 1 equiv. <b>1</b> | 50                             | 50                                  | 48.5                               | 49.5                                    | 1.0                             |
| Cyt c + 2 equiv. <b>1</b> | 50                             | 100                                 | 48.1                               | 97.8                                    | 2.0                             |
| Cyt c + 3 equiv. <b>1</b> | 50                             | 150                                 | 47.6                               | 145.4                                   | 3.1                             |
| Cyt c + 4 equiv. <b>1</b> | 50                             | 200                                 | 47.1                               | 195.2                                   | 4.1                             |
| Cyt c + 5 equiv. <b>1</b> | 50                             | 250                                 | 45.7                               | 193.7                                   | 4.2                             |
